# Supplementary material for: Diabetic concentrations of metformin inhibit platelet-mediated ovarian cancer cell progression
Source: PubMed Central journal article supplement (PMC5400552; doi:10.18632/oncotarget.15348), 2017-02-15
Supplement: oncotarget-08-20865-s001.pdf [file oncotarget-08-20865-s001.pdf]

## Diabetic concentrations of metformin inhibit platelet-mediated ovarian cancer cell progression

### Supplementary Materials

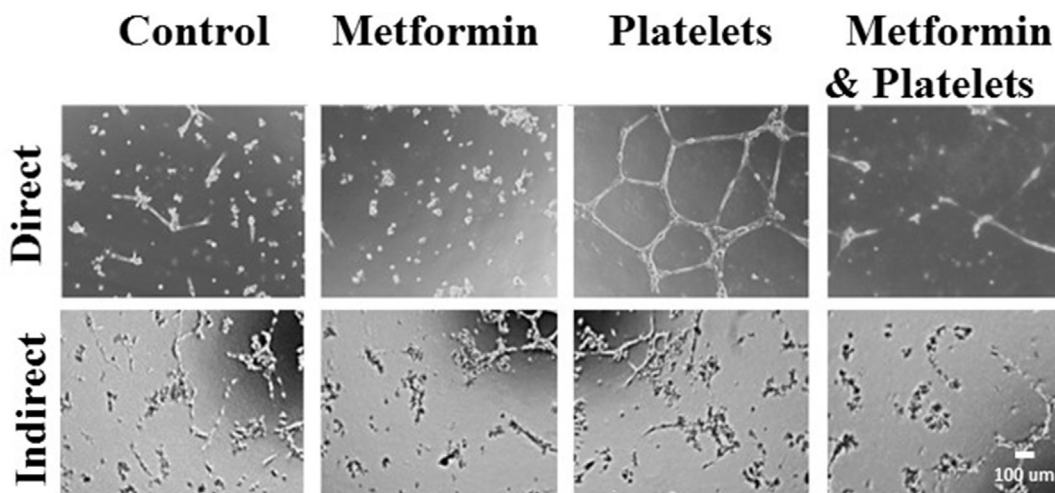

**Supplementary Figure 1: Platelets incubated at 37°C for 24 hours are not capable of increasing the formation of tubular structures in matrigel.** (A) Direct: Endothelial cells (HUVEC) were seeded onto matrigel and incubated in the presence of vehicle (control), metformin (20 uM) platelets (150,000/ $\mu$ L) or metformin and platelets. (B) Indirect: HUVEC were seeded onto matrigel and incubated in the presence of culture media to which vehicle (control), metformin (20 uM) platelets (150,000/ $\mu$ L) or metformin and platelets had been previously added for 24 hrs at 37°C.
